# Supplementary material
Source: publisher figshare collection journal article supplement (https://frontiersin.figshare.com/ndownloader/files/30742930)
Supplement: Supplementary file [file 30742930]

## Supplementary Material

### Supplementary Figures

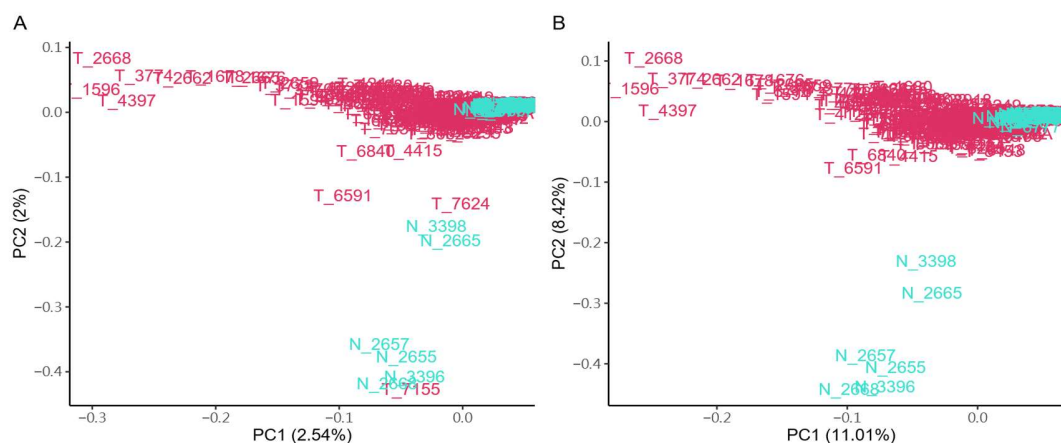

**Supplementary Figure 1:** Principal component analysis of isomiRs in LUAD 33 normal and 442 tumor LUAD samples. (A) PCA of 14000 isomiRs (B) PCA of 1522 isomiRs expressed in at least 50% dead patients.

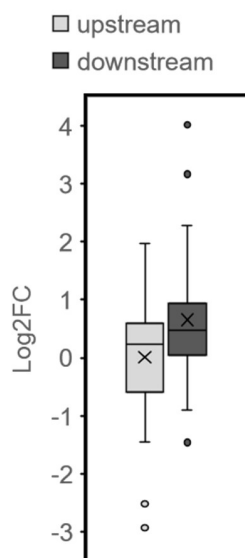

**Supplementary Figure 2:** Log2 fold change of protective isomiRs with the upstream and downstream shift.
